# Supplementary material for: Coupling Microdroplet-Based Sample Preparation, Multiplexed Isobaric Labeling, and Nanoflow Peptide Fractionation for Deep Proteome Profiling of the Tissue Microenvironment
Source: PubMed Central journal article supplement — Anal Chem. 2024 Aug 1;96(32):12973–82. doi: 10.1021/acs.analchem.4c00523 (PMC11325296; doi:10.1021/acs.analchem.4c00523), 2024-08-01

## Supporting Information

# Coupling microdroplet-based sample preparation, multiplexed isobaric labeling, and nanoflow peptide fractionation for deep proteome profiling of tissue microenvironment

Marija Veličković<sup>1</sup>, Thomas L. Fillmore<sup>1</sup>, Isaac Kwame Attah<sup>2</sup>, Camilo Posso<sup>2</sup>, James C. Pino<sup>2</sup>, Rui Zhao<sup>1</sup>, Sarah M. Williams<sup>1</sup>, Dušan Veličković<sup>1</sup>, Jon M. Jacobs<sup>1</sup>, Kristin E. Burnum-Johnson<sup>1</sup>, Ying Zhu<sup>1,†,\*</sup>, and Paul D. Pichowski<sup>1,\*</sup>

<sup>1</sup> Environmental Molecular Sciences Laboratory, Pacific Northwest National Laboratory, Richland, WA, 99354, USA.

<sup>2</sup> Biological Sciences Division, Pacific Northwest National Laboratory, Richland, WA, 99354, USA.

†Present Address: Department of Microchemistry, Proteomics, Lipidomics and Next Generation Sequencing, Genentech, 1 DNA Way, South San Francisco, 94080, United States.

\* Paul D. Pichowski, contact information: [Paul.Pichowski@pnl.gov](mailto:Paul.Pichowski@pnl.gov)

\* Ying Zhu, contact information: [zhu.ying@gene.com](mailto:zhu.ying@gene.com)

### Table of Contents

Supporting figure 1. Images of the dissection and collection of pancreas tissue voxels into the microPOTS chip.

Supporting Figure 2: The heat map visualization of distinct cluster of all significant genes, indicating different biological functions of the two tissue types (islet and acinar).

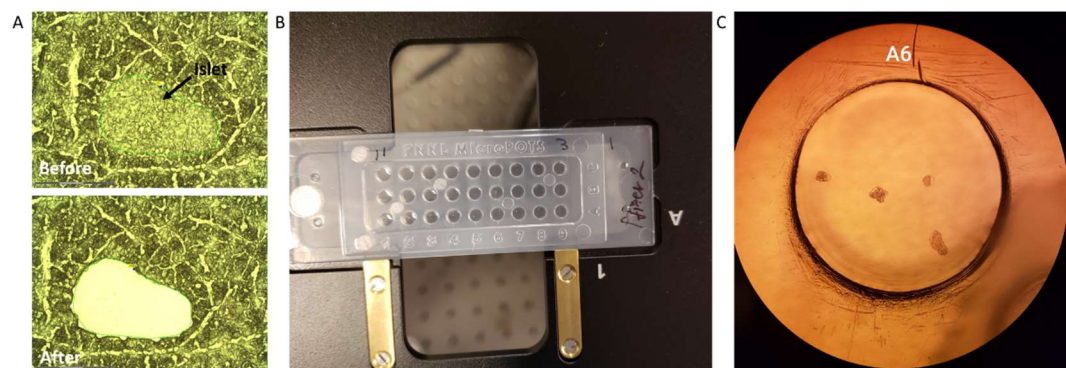

**Supporting figure 1.** Images of the dissection and collection of pancreas tissue voxels into the microPOTS chip. A) Islet region before and after laser-microdissection B) Microchip with collected pancreas tissue samples. Microwells were preloaded with DMSO that served as a capturing medium. C) Islet tissue voxels collected into microwell A6, observed under the Zeiss LCM microscope.

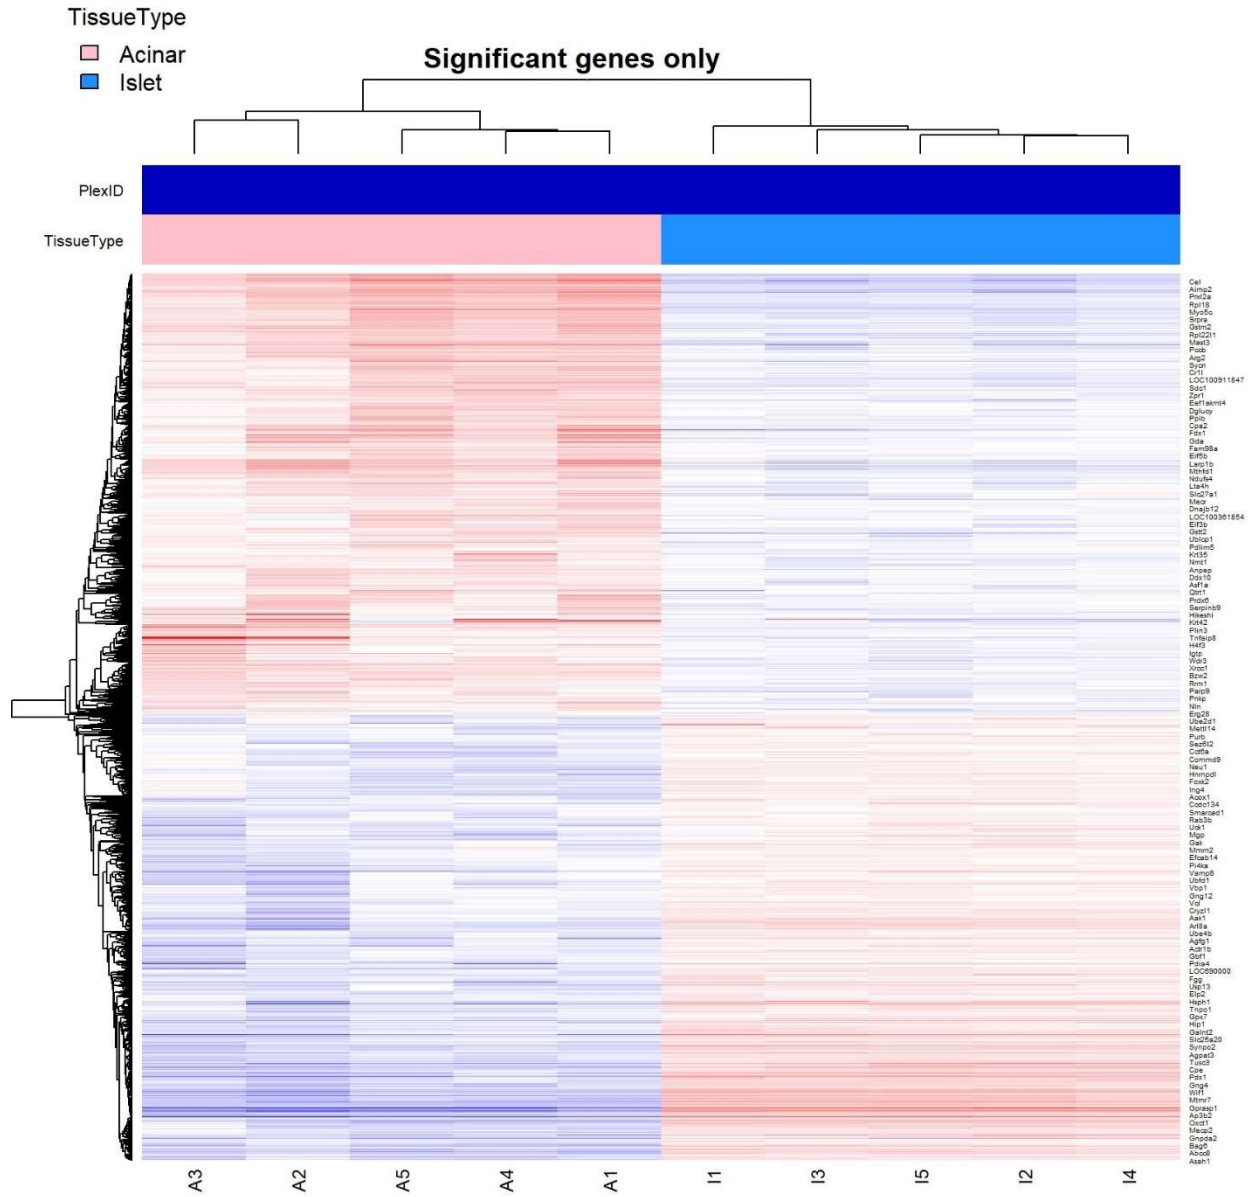

Supplement: ac4c00523_si_001.pdf [file ac4c00523_si_001.pdf]
